# Supplementary material for: An injectable hydrogel dressing for controlled release of hydrogen sulfide pleiotropically mediates the wound microenvironment
Source: Royal Society of Chemistry journal article supplement (doi:10.1039/d4tb00411f), 2024-01-01
Supplement: d4tb00411f1.pdf [file d4tb00411f1.pdf]

## 1 **Supporting Information**

### 2 **Injectable Hydrogel Dressing for Controlled Release of Hydrogen Sulfide Pleiotropically** 3 **Mediates Wound Microenvironment**

4 Junwei Yang,<sup>a</sup> Xianzhen Dong,<sup>a</sup> Wenying Wei,<sup>a</sup> Kun Liu,<sup>a</sup> Xiaopei Wu,<sup>a</sup> Honglian Dai<sup>\*a,b</sup>

5 Junwei Yang, Xianzhen Dong, Wenying Wei, Kun Liu, Xinyue Liang, Yuanfang Huo, Zhiqiang Li, Xiaopei Wu,  
6 Honglian Dai

7 State Key Laboratory of Advanced Technology for Materials Synthesis and Processing, Biomedical Materials and  
8 Engineering Research Center of Hubei Province, Wuhan University of Technology, Wuhan 430070, China.

9

10 Honglian Dai

11 Wuhan University of Technology Advanced Engineering Technology Research Institute of Zhongshan City,

12 Zhongshan 528400, China Email: daihonglian@whut.edu.cn

13

#### 14 **1. Synthesis of PMet**

15 2 g mPEG4000-NH<sub>2</sub> (1 equiv.) were introduced into a single-necked flask and subjected to  
16 vacuum drying at 80 °C in an oil bath for a duration of 2 h. Following the cooling to r.t., 60  
17 mL of anhydrous DMF was added, along with 2.1901 g of Met NCA (28 equiv.) were added  
18 and the reaction was stirred under argon protection for three days. The reaction was settled  
19 with 600 mL ice ether, the solid was vacuum filtration and dissolved in DMF, dialyzed with  
20 deionized water for three days (MwCO 3500 Da), and the white solid was obtained by freeze-  
21 dried. <sup>1</sup>H NMR (500 MHz, Chloroform-*d*) δ 4.11 (s, 10H), 3.64 (s, 360H), 2.57 (s, 20H), 1.62  
22 (s, 120H).

23

#### 24 **2. Synthesis of Amino-terminated F127 (F127-NH<sub>2</sub>) and Amino-terminated mPEG4000**

25 (mPEG4000-NH<sub>2</sub>) were prepared by the following method: F127 (5 mmol), potassium  
26 hydroxide (100 mmol), and paratoluensulfonyl chloride (50 mmol) were added to 300 mL of  
27 DCM and stirred at r.t. for 7 days. Then the resultant mixture was washed with brine (5 × 100  
28 mL), dried over MgSO<sub>4</sub>, concentrated using rotary evaporator, settled with ether, the sediment  
29 was filtered and dried in vacuo to receive a white solid. The product (10 g) was dissolved in  
30 NH<sub>3</sub>·H<sub>2</sub>O (100 mL), then NH<sub>4</sub>Cl were added to the solution and stirred for 7 days at r.t. The  
31 mixed solution was extracted with DCM until the solution was clear. The organic layer was

32 collected, washed with brine, dried over  $\text{MgSO}_4$ , concentrated, and settled with ice ether. Then,  
33 the sediment was collected with suction filtration and dried in vacuo to obtain F127- $\text{NH}_2$ . The  
34 procedure for preparing mPEG4000- $\text{NH}_2$  was the same, except that F127 was substituted with  
35 mPEG4000 (5 mmol).

36

### 37 **3. Synthesis of L-aspartic Acid 4-benzyl ester N-carboxy Anhydride (Asp NCA) and L-** 38 **methionine N-carboxy Anhydride (Met NCA)**

39 A mixture of amino acid (10 g, 3 equiv.), THF (150 mL), and triphosgene (1.25 equiv.) were  
40 added to the 250 mL flame-dried three-necked flask and reacted under argon bubble in a 65 °C  
41 oil bath. After the solution was clarified, the excess solvent was removed with argon, and the  
42 concentrated solution was poured into cold n-hexane to settle. The product was dissolved in  
43 EA, washed with cold saturated salt water, dried with  $\text{MgSO}_4$ , and the solution was vacuum-  
44 dried after filtration to obtain white solid (Asp NCA) and yellow liquid (Met NCA). Asp NCA  
45  $^1\text{H}$  NMR (500 MHz, Chloroform- $d$ )  $\delta$  7.44 – 7.32 (m, 5H), 5.19 (s, 2H), 3.15 – 2.83 (m, 2H).  
46 Met NCA  $^1\text{H}$  NMR (500 MHz, DMSO- $d_6$ )  $\delta$  5.09 – 4.94 (m, 1H), 3.10 – 3.01 (m, 2H), 2.56 –  
47 2.45 (m, 5H).

48

### 49 **4. PTCM@PMet NPs release PTCM upon stimulation with different concentrations of $\text{H}_2\text{O}_2$**

50 Characterization of the release of PTCM from PTCM@PMet NPs using dialysis method.  
51 Firstly, PBS (pH7.4, 40 mL) buffer and Tween80 (0.2 mL) were added to a 50 mL centrifuge  
52 tube, which was then placed in a constant temperature shaker and incubated for 30 minutes.  
53 Subsequently, PTCM@PMet NPs (effective drug concentration: 50  $\mu\text{M}$ ) were weighed and  
54 added to 2 ml PBS solutions containing  $\text{H}_2\text{O}_2$  (50  $\mu\text{M}$ ). The solution was poured into a dialysis  
55 bag, sealed, and placed in the preheated centrifuge tube. At 2, 8, 24, and 48 h time points, 3  
56 mL of the solution from the centrifuge tube was withdrawn and an equal amount of fresh PBS  
57 buffer was added. Subsequently, the decomposition by-products of PTCM in hydrogen  
58 peroxide were characterized by high-performance liquid chromatography (HPLC), and the

59 absorption peak of p-hydroxy benzyl alcohol at 275 nm was measured to calculate the  
60 cumulative release of PTCM under different concentrations of hydrogen peroxide stimulation.

## 61 **5. Skin Scalded Wound Model Building and Treatment**

62 Male SD rats (180–220 g, Experimental Animal Research Center, Hubei Province, China) were  
63 used in this study. All rats were randomly divided into three groups (n=12), including control  
64 (saline) F127-P(Asp-NHS) and PTCM@PMet NPs/F127-P(Asp-NHS) groups. The rats were  
65 administered intraperitoneal injections of 5% pentobarbital sodium at a dosage of 40 mg/kg for  
66 anesthesia. The rats underwent a procedure where their back hair was removed and they were  
67 immobilized on the operating table in a prone position. The aluminum rod was placed in 100  
68 °C water for 10 min, and rapidly placed on the back of the rats for 20 s, and the ice pack was  
69 immediately placed on the scalded site for 1 min to quench the scald. The process was repeated  
70 to create the second scald on either side of the spine. The scalded site was injected  
71 subcutaneously with 1 mL of saline to prevent dehydration, and all wounds were covered with  
72 Tegaderm Film (3M Health Care, USA) to limit infection. Following the surgical procedure,  
73 the rats were administered buprenorphine at a dosage of 0.05 mg/kg and saline at a volume of  
74 1ml per mouse on daily basis based on their behavior. Two days after the scald, the rats were  
75 anesthetized and all necrotic tissue was demineralized using a 15 mm diameter biopsy punch  
76 to create a fresh full-thickness wound. The day of full-thickness wound establishment was  
77 recorded as day 0. The wound in control group was washed with saline, and the prepared  
78 precursor solution was injected into the wound in F127-P(Asp-NHS) and PTCM@PMet  
79 NPs/F127-P(Asp-NHS) and gelled in situ, and the material was added once every three days.  
80 On days 0, 5, 10, and 14, the skin tissue samples were obtained, and the images of the wounds  
81 were recorded. The area of the wound was analyzed using ImageJ 1.8 software. After washing  
82 with PBS, the skin was fixed in 4% paraformaldehyde for 24 h, and then dipped in ethanol and  
83 the mixed solution of ethanol and dimethylbenzene. The tissue specimen was immersed in  
84 paraffin and subsequently sliced into thin sections with a thickness of 5  $\mu\text{m}$ .

85

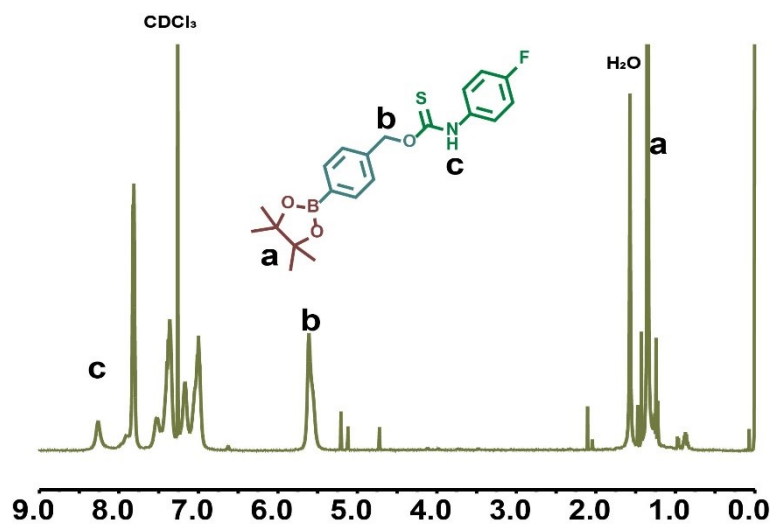

86  
87

Fig. S1. <sup>1</sup>H NMR spectrum of PTCM.

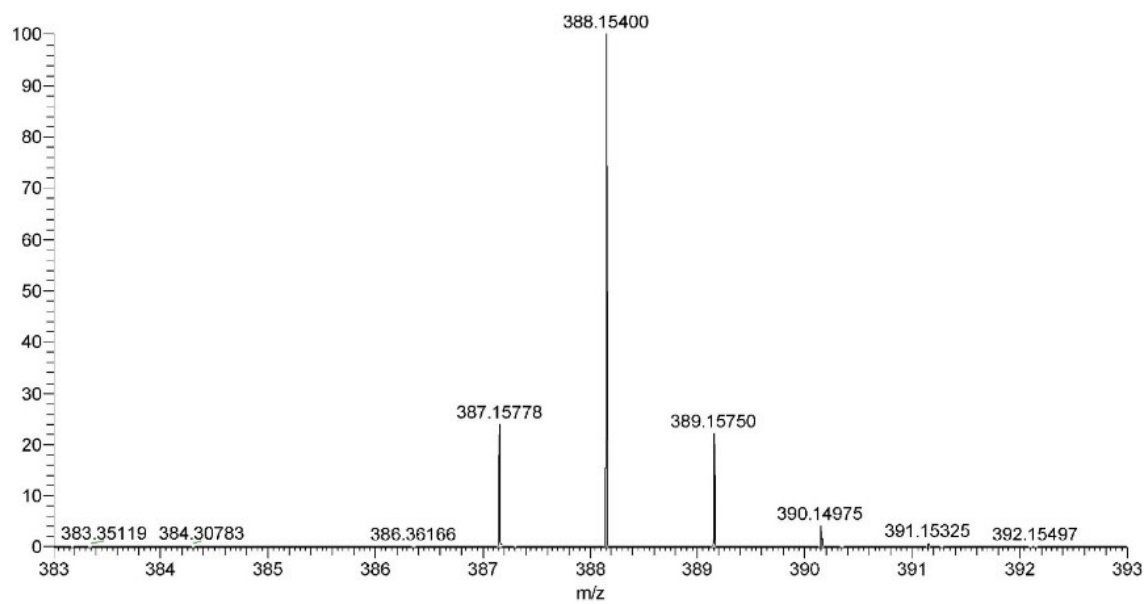

88  
89  
90

Fig. S2. HRMS results of PTCM.

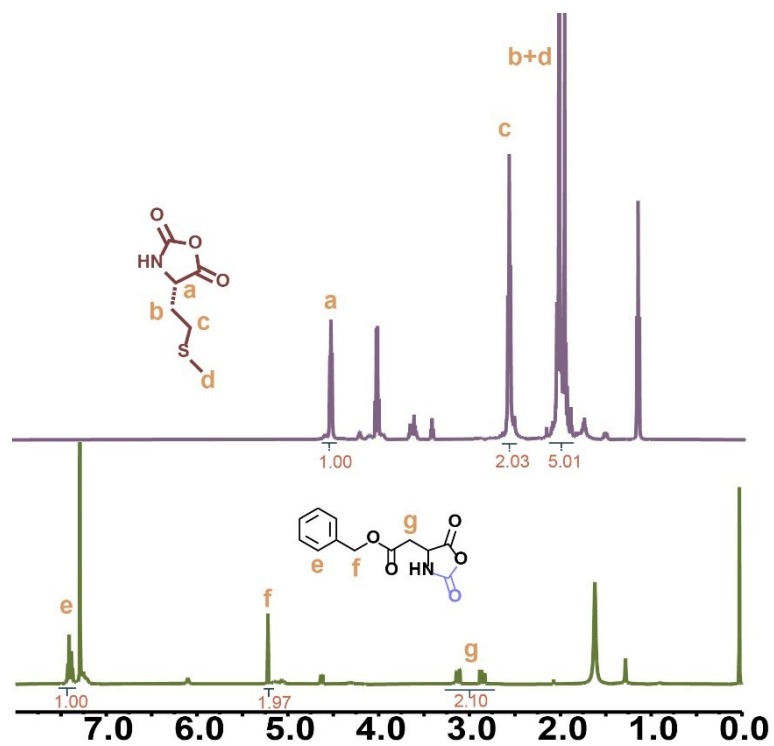

91  
92

Fig. S3. <sup>1</sup>H NMR spectrum of Asp NCA in CDCl<sub>3</sub> and Met NCA in DMSO-d<sub>6</sub>.

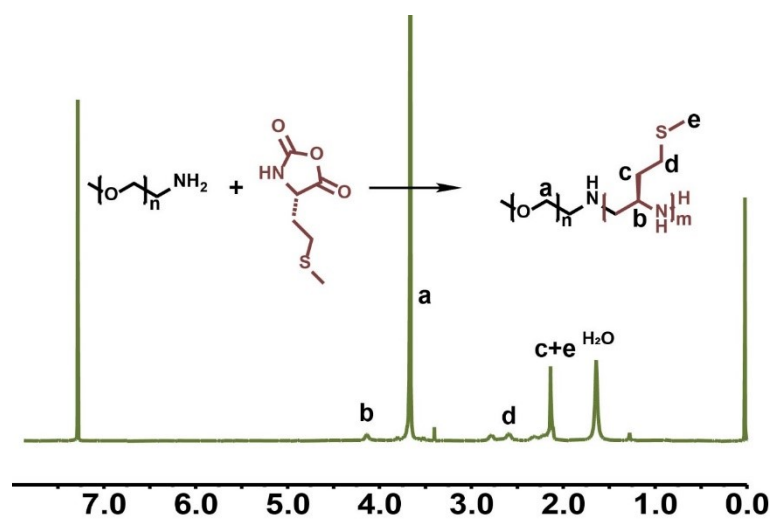

93  
94

Fig. S4. <sup>1</sup>H NMR spectrum of mPEG-PMet in CDCl<sub>3</sub>.

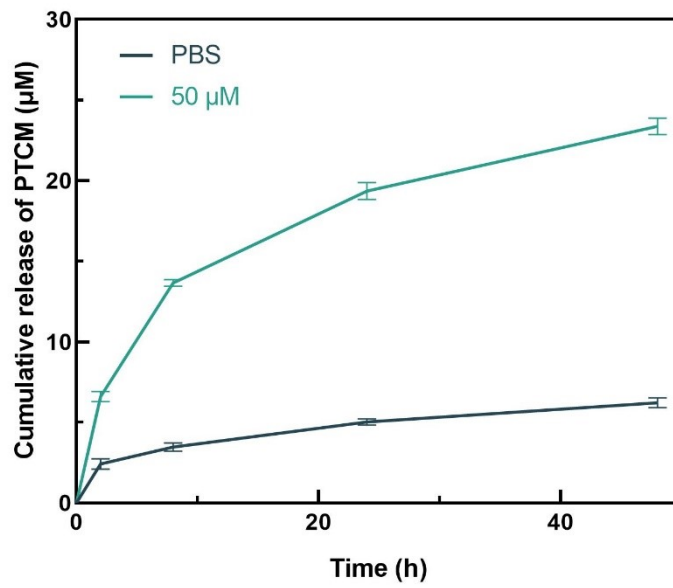

95

96 Fig. S5. PTCM release of PTCM@PMet NPs in H<sub>2</sub>O<sub>2</sub> (50 µM).

97

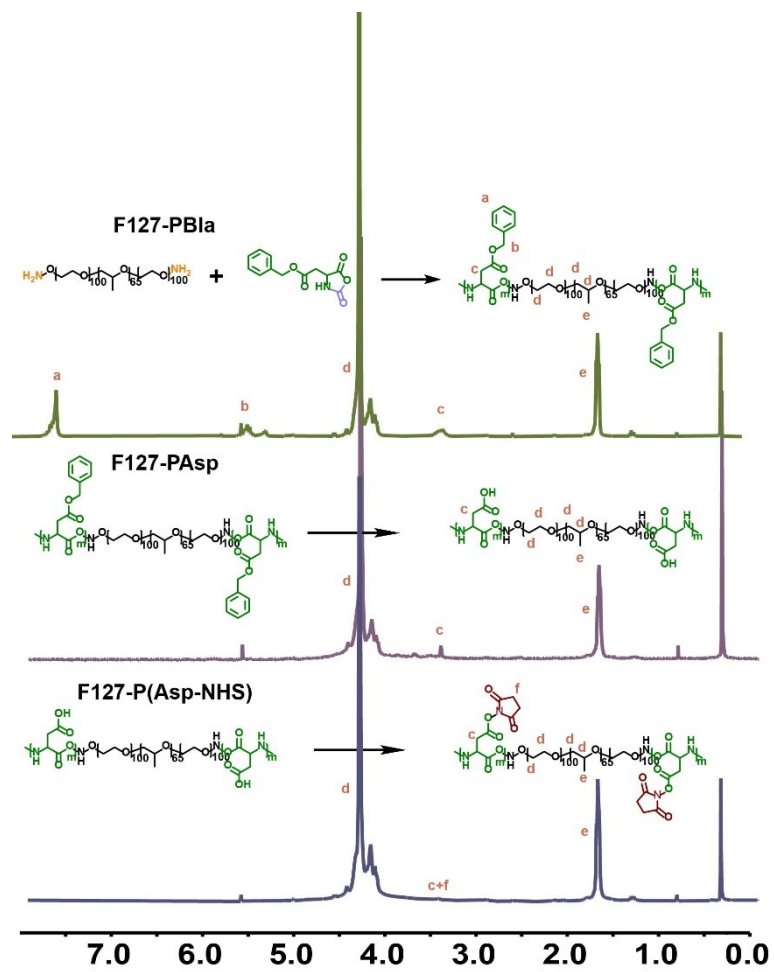

98

99 Fig. S6. <sup>1</sup>H NMR spectra of the products of each step during the synthesis of F127-P(Asp-NHS) in TFA-d.

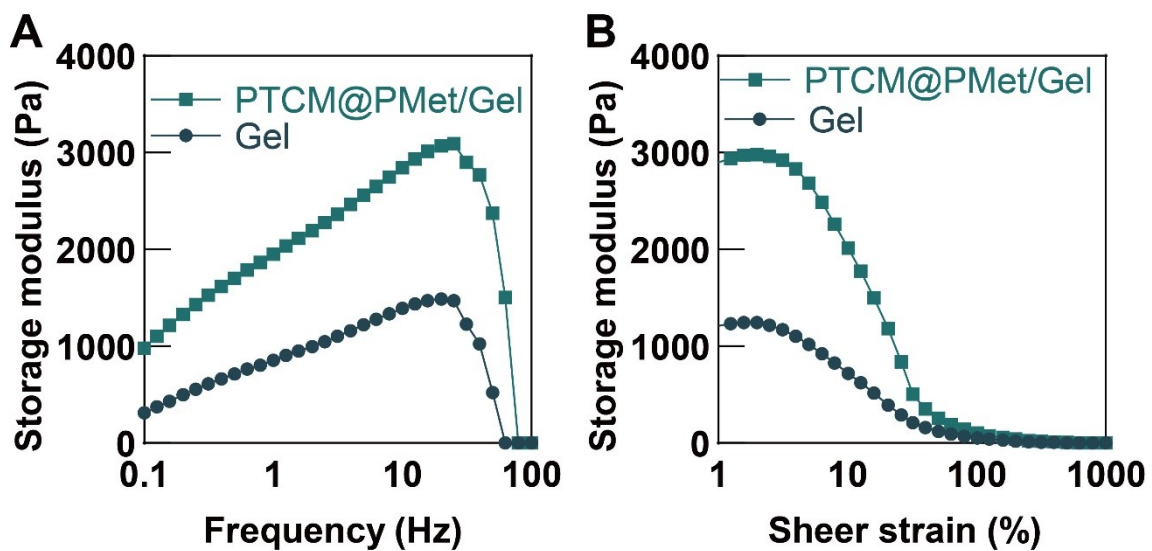

100

101 Fig. S7. (A) Frequency sweep measurement (0.01-100 Hz; 1% strain) of F127-P(Asp-NHS) and PTCM@PMet/F127-P(Asp-NHS)

102 hydrogels. (B) Storage modulus ( $G'$ ) curves from rotational strain sweeps (0.01-1000% strain; 10 Hz).

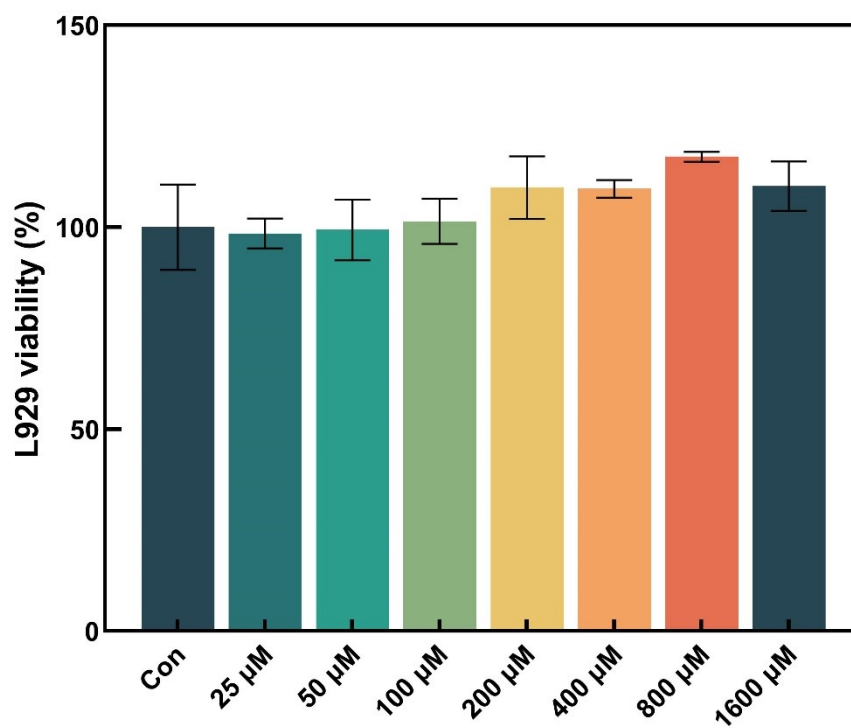

103

104 Fig. S8. Cytotoxicity of different concentrations of H<sub>2</sub>S on L929 cells at 1 day.
